# Supplementary material
Source: PubMed Central journal article supplement (PMC1348006)
Supplement: pnas_0510171102_1.pdf [file pnas_0510171102_1.pdf]

**Table 1. Restriction landmark genomic scanning (RLGS) analysis along 6q23-24 in primary HNSCC and NSCLC**

| NSCLC | n2D61 | a5G27 | a6E12 | n2E20 | a2F23 | a5E34 | n4F51 | a5F58 | n6E07 | n3G47 |
|-------|-------|-------|-------|-------|-------|-------|-------|-------|-------|-------|
| 1     |       |       | ■     |       |       |       |       |       |       |       |
| 2     |       |       | ■     | ■     | ■     | ■     |       |       |       |       |
| 3     |       |       | ■     | ■     |       |       |       |       |       |       |
| 4     | ■     |       | ■     |       |       |       | ■     |       | ■     | ■     |
| 5     |       |       | ■     | ■     |       | ■     |       |       |       |       |
| 6     |       |       |       |       |       |       |       |       |       |       |
| 7     |       |       | ■     |       |       | ■     |       |       |       |       |
| 8     |       |       | ■     | ■     |       | ■     |       |       |       | ■     |
| 9     |       |       | ■     |       |       |       |       |       |       |       |
| 10    |       |       | ■     |       |       |       | N     |       |       |       |
| 11    |       |       |       |       |       |       |       | N     |       | ■     |
| 12    |       | N     | ■     |       |       |       |       | N     |       |       |
| 13    |       |       |       |       |       |       |       | N     | N     |       |
| 14    |       |       | ■     | ■     |       | ■     |       | N     | N     |       |
| 15    |       |       | ■     |       |       |       |       | N     |       |       |
| 16    |       |       | ■     | ■     |       |       | ■     | N     |       |       |
| 17    |       |       | ■     | ■     |       | ■     | N     |       |       | ■     |
| 18    |       |       | ■     |       |       | ■     |       |       |       |       |
| 19    |       |       | ■     |       |       | ■     |       |       |       |       |
| 20    |       |       | ■     |       |       |       | ■     |       |       |       |
| 21    |       |       | ■     |       |       |       |       |       |       |       |
| 22    | ■     |       | N     | ■     |       |       |       |       |       |       |
| 23    | N     | N     | ■     | ■     |       |       |       |       |       | ■     |
| 24    |       |       | N     | N     |       | N     |       |       |       |       |

| HNSCC | n2D61 | a5G27 | a6E12 | n2E20 | a2F23 | a5E34 | n4F51 | a5F58 | n6E07 | n3G47 |
|-------|-------|-------|-------|-------|-------|-------|-------|-------|-------|-------|
| 1     |       |       |       |       |       |       |       |       |       | ■     |
| 2     |       |       | ■     | ■     |       | ■     |       |       |       |       |
| 3     |       |       | ■     |       |       | ■     |       |       |       | ■     |
| 4     |       |       | ■     |       |       |       |       |       |       |       |
| 5     |       |       | ■     |       |       | ■     |       |       |       |       |
| 6     |       |       | ■     |       |       |       |       |       |       |       |
| 7     |       |       | ■     |       |       | ■     |       |       |       |       |
| 8     |       |       | ■     |       |       |       |       |       |       |       |
| 9     |       |       |       |       |       |       |       |       |       |       |
| 10    |       |       |       |       |       |       |       |       |       |       |
| 11    |       |       | ■     |       |       |       |       |       |       |       |
| 12    |       | N     | ■     | ■     |       | ■     |       |       |       |       |
| 13    |       |       |       |       |       |       |       |       |       |       |
| 14    |       |       |       |       |       |       |       |       |       |       |
| 15    |       |       | ■     |       |       |       |       |       |       |       |

RLGS analyses in individual samples are listed in rows, and RLGS fragments are listed in columns. Methylated (filled box), unmethylated (open box), and partially methylated

(shaded box) NotI (n) and AscI sites (a) are listed with the RLGS master profile addresses. N refers to a RLGS fragment that cannot be analyzed.
